# Supplementary material for: An OB-fold complex controls the repair pathways for DNA double-strand breaks
Source: PubMed Central journal article supplement (PMC6156606; doi:10.1038/s41467-018-06407-7), 2018-09-25
Supplement: 41467_2018_6407_MOESM2_ESM.pdf [file 41467_2018_6407_MOESM2_ESM.pdf]

This manuscript has been previously reviewed at another journal that is not operating a transparent peer review scheme. This document only contains reviewer comments and rebuttal letters for versions considered at Nature Communications .

**REVIEWERS' COMMENTS:**

**Reviewer #1 (Remarks to the Author):**

**The authors have satisfactorily addressed my concerns.**

REVIEWERS' COMMENTS:

Reviewer #1 (Remarks to the Author):

The authors have satisfactorily addressed my concerns.

Re: We thank this reviewer for his/her positive comment!
