# Supplementary material for: An OB-fold complex controls the repair pathways for DNA double-strand breaks
Source: PubMed Central journal article supplement (PMC6156606; doi:10.1038/s41467-018-06407-7), 2018-09-25
Supplement: 41467_2018_6407_MOESM3_ESM.pdf [file 41467_2018_6407_MOESM3_ESM.pdf]

## **Description of Additional Supplementary Files**

File Name: Supplementary Data 1

Description: Mass spectrometry analysis of the mixtures of the indicated immunoprecipitates
